1 **The use of artificial intelligence in the diagnosis of carious lesions: Systematic review and meta-analysis**

2  
3 Vanessa Gallego Arias Pecorari<sup>1,2</sup>, Laís Renata Almeida Cezário<sup>2</sup>, Caio Vieira de Barros Arato<sup>2\*</sup>, Tainá de Lima  
4 Costa<sup>1</sup>, Karine Laura Cortellazzi<sup>2</sup>, Roberto Fiório Pecorari<sup>2</sup>, José Erasmo Silva<sup>3</sup>

5  
6 <sup>1</sup>Paulista University, UNIP, São Paulo, Brazil

7 <sup>2</sup>School of Dentistry of Piracicaba, Universidade Estadual de Campinas, UNICAMP, São Paulo, Brazil

8 <sup>3</sup>University of São Paulo, USP, São Paulo, Brazil

9  
10 \*Corresponding author: [caio.arato@hotmail.com](mailto:caio.arato@hotmail.com)

11  
12 <sup>¶</sup>These authors contributed equally to this work.

13 <sup>&</sup>These authors also contributed equally to this work.

14  
15  
16  
17  
18  
19  
20  
21  
22  
23  
24  
25  
26  
27  
28  
29  
30  
31  
32  
33  
34  
35  
36  
37  
38  
39  
40  
41  
42  
43  
44  
45  
46  
47  
48  
49  
50  
51  
52

## 53 Abstract

54 **Background:** The use of Artificial Intelligence (AI) has many applications in the healthcare field. Dental caries  
55 is a disease with a prevalence rate of over 50% in Brazil. The diagnosis of caries is usually based on a clinical  
56 examination and supplementary tests such as X-rays. The accuracy of a diagnostic test is evaluated by its  
57 sensitivity, specificity, and accuracy. Various algorithms and neural network configurations are being used  
58 for caries diagnosis. **Objective:** This systematic review evaluated the sensitivity, specificity, and accuracy of  
59 using deep machine learning through a convolutional neural network in diagnosing dental caries. **Methods:**  
60 This systematic review was conducted in accordance with the Preferred Reporting Items for Systematic  
61 review and Meta-Analyses (PRISMA) 2020 guidelines and registered with Prospero (ID CRD42024411477).  
62 We used the PubMed, MEDLINE, and LILACS databases and MeSH and DECs descriptors in the search. **Results:**  
63 After analyzing the eligibility of the articles, we selected 33 for full-text reading and included 13 in the meta-  
64 analysis. We used the sensitivity, specificity, accuracy data, and the number of positive and negative tests to  
65 generate a 2x2 table with TP, FP, FN, TN rates, and accuracy. We evaluated the heterogeneity of the SROC  
66 curve using the Zhou & Dendurkuri I 2 approach. The results showed that the sensitivity and specificity of the  
67 machine learning for detecting dental caries were 0.79 and 0.87, respectively, and the AUC of the SROC curve  
68 was 0.885. **Conclusion:** The literature presented a variety of convolutional neural networks [CNN]  
69 architecture, image acquisition methods, and training volumes, which could lead to heterogeneity. However,  
70 the accuracy of using artificial intelligence for caries diagnosis was high, making it an essential tool for  
71 dentistry.

72 **Keywords:** Deep learning, Systematic review, caries diagnosis, artificial intelligence.

73

## 74 Introduction

75 Dental caries is one of the most prevalent diseases (about 50%) in children worldwide and is  
76 considered a public health problem (Bagramian, 2009). If not treated in time, it can affect not only chewing  
77 function but also speech, smile and the psychosocial environment and quality of life of the child and family  
78 (Losso, 2009). Dental caries is a multifactorial disease involving bacterial, dietary and host determinants  
79 influenced by multiple sociological and environmental factors (Uribe, 2009; Leong *et al.*, 2013).

80 Diagnosis of the disease Caries is a complex process which involves the interpretation of a set of data  
81 from clinical signs and symptoms and complementary exams (Nyvad, 2004; Pretty, 2006). The method for  
82 detecting carious lesions must have some characteristics essential to be considered adequate. Be reliable,  
83 non-invasive, capable of detecting caries lesions at an early stage and capable of differentiating lesions  
84 reversible from irreversible. In addition to affordable cost, comfort for the patient, speed and ease of  
85 execution, it must also be viable for all surfaces of the teeth with adequate accuracy (Marinho, 1998).

86 The radiographic detection of tooth decay is fundamentally based on the fact that with the  
87 progression of a tooth decay lesion, the mineral content of tooth enamel and dentin decreases, resulting in  
88 an attenuation of the X-ray beams when they pass through the tooth. These characteristics can be observed  
89 in the image with increased radiographic density (Silva, 2008). The radiographic examination has high  
90 sensitivity in detecting dentin caries lesions but low sensitivity for detecting enamel caries lesions (Soares *et al.*, 2012). The most recommended technique for the radiographic detection of caries is “bitewing,” also  
91 known as interproximal (Braga, 2010; Wenzel, 2004). The interproximal radiography allows a better  
92 estimation of the more sensitive depth of proximal and occlusal caries in dentin than clinical inspection alone  
93 (Purger, 2011)

94  
95 The artificial neural network [ANN] is the basis of machine learning [“machine learning - ML”] and  
96 deep learning [“deep learning - DL”]. A *neural network* is an algorithm composed of layers connected that  
97 processes input data, which were extracted from the X-ray image, using convulsive neural networks, and  
98 through an activation function, it will classify patients as sick or not sick in the output layer. Artificial  
99 intelligence [AI], specifically deep learning using convolutional neural networks [CNNs], has been suggested  
100 to improve the reliability and validity of diagnosis by image analysis. CNNs allow mapping an input (image)  
101 to an output (classification) based on a set of weights and learned data (LeCun *et al.*, 2015). Accuracy above  
102 90% enables the development of software and applications that will assist the dentist in decision-making,  
103 enabling the diagnosis of the disease for the population in censuses, public services and private practices.

104 This work aims to evaluate the sensitivity, specificity and accuracy of using deep machine learning  
105 through CNNs in diagnosing dental caries in periapical radiographs of adults through a systematic review.

106

## 107 **Material and methods**

108 Our study protocol was registered on PROSPERO (CRD42024411477). This systematic review and  
109 meta-analysis followed the Preferred Reporting Items for Systematic Reviews and Meta-Analyses (PRISMA)  
110 standards. Therefore, prior to the beginning of the research, a search was carried out in the literature to find  
111 out whether there was a need for a systematic review or whether other reviews that addressed the proposed  
112 topic already existed. As we did not find matching work, we drew the protocol for the Systematic registration,  
113 and the project followed the criteria recommended by PRISMA and the Minimum information about the  
114 clinical artificial intelligence modelling checklist (MI-CLAIM).

115

## 116 **Search strategy**

117 Two authors (VGAP and RFP) separately performed PubMed, MEDLINE, LILACS and Cochrane Library  
118 database search using standard search formulas. To search for gray literature (unpublished studies), we used  
119 the following sources: ISI Web of Knowledge, British Library Inside, BMC Meeting Abstracts, OpenSIGLE,  
120 Clinical Trials database and REBEC. Additionally, we researched the thesis database, government publications  
121 and CAPES.

122 We created the search strategy using subject descriptors (index) for MeSH (Medical Subject  
123 Headings) and DECs (Health Science Descriptors). To search for works, we selected terms, the increase in  
124 uncontrolled vocabulary with synonymous words, acronyms, related terms and spelling variations ("entry  
125 terms"), as shown in tables 1 to 3 in the different bases used. The search rule and Syntax were through  
126 Boolean logic that uses logical operators OR, AND and NOT, as shown below:

127

128 **VHL: MH:" Dental Caries " OR (Tooth Decay) OR (Tooth Decay) OR ( Cavities ) OR ( Dental Cavities ) OR (**  
129 **Dental Cavities ) OR ( Decayed Tooth ) OR ( Carious Lesions ) OR ( White Spots ) OR (Dental Caries) OR (**  
130 **Caries ) OR ( Caries Dentales ) OR ( Carious Lesions ) OR ( White Spots Dentales ) OR (Dental Caries) OR (**  
131 **Caries, Dental ) OR ( Carious Dentin ) OR ( Carious Dentins ) OR ( Carious Injury ) OR ( Carious Injuries ) OR (**  
132 **Decay , Dental ) OR ( Dental Decay ) OR ( Dental White Spot ) OR ( Dental White Spots ) OR ( Dentin , Carious**  
133 **) OR ( Dentins , Carious ) OR ( Lesion , Carious ) OR ( Lesions , Carious ) OR ( Spot, Dental White ) OR ( Spots,**  
134 **Dental White ) OR ( White Spot, Dental ) OR ( White Spots, Dental ) AND MH:" Machine Learning" OR**  
135 **(Machine Learning) OR ( Machine Learning ) OR ( Transfer Learning ) OR ( Machine Learning ) OR ( Machine**  
136 **Learning ) OR ( Transfer Learning ) OR ( Automatic Learning ) OR ( Transfer Learning ) \_ OR ( Machine**  
137 **Learning) OR ( Learning, Machine ) OR ( Learning, Transfer ) OR ( Transfer Learning )**

138 **PUBMED: "Dental Caries"[Mesh] OR (Dental Caries) OR ( Caries, Dental ) OR ( Carious Dentin ) OR ( Carious**  
139 **Dentins ) OR ( Carious Lesion ) OR ( Carious Lesions ) OR ( Decay, Dental ) OR ( Dental Decay ) OR ( Dental**  
140 **White Spot ) OR ( Dental White Spots ) OR ( Dentin, Carious ) OR ( Dentins, Carious ) OR ( Lesion, Carious )**  
141 **OR ( Lesions, Carious ) OR ( Spot, Dental White ) OR ( Spots, Dental White ) OR ( White Spot, Dental ) OR (**  
142 **White Spots, Dental ) AND "Machine Learning"[Mesh] OR (Machine Learning) OR ( Learning, Machine ) OR (**  
143 **Learning, Transfer ) OR ( Transfer Learning )**

144

## 145 **Eligibility Criteria**

146 We included the literature published in PubMed, MEDLINE, LILACS, and the Cochrane Library  
147 database and gray literature on diagnosing dental caries in adults using AI in radiographic images.

148 The inclusion criteria was as follows: Participants: patients with occlusal and/or interproximal dental  
149 caries of both sexes in permanent dentition who were diagnosed using interproximal or periapical X-ray  
150 imaging; Index test: studies that used the use of artificial intelligence as an index test; Reference test: Visual  
151 diagnosis by specialists in the field; Outcomes: sensitivity, specificity and accuracy and studies that evaluated  
152 caries in percentage or qualitatively classifying in presence and absence; Types of studies: observational  
153 cross-sectional studies, cohort, case-control and clinical trials.

154 Excluded criteria were case reports and animal studies, decayed primary teeth, studies that analyzed  
155 artificial intelligence for the diagnosis of diseases other than dental caries in the field of dentistry knowledge,

156 studies that the response variable (outcome) or parameters have not been clearly reported, impossibility of  
157 extracting study data and lack of response after contact with the study authors.

158

### 159 **Study selection**

160 Before searching for articles, we calibrated reviewers to ensure high reliability in selecting works.  
161 The references of the selected articles were listed using the Rayyan reference manager  
162 <<http://rayyan.qcri.org/reviews/5>>. We removed the duplicate articles after adding the search results from  
163 all databases. Two reviewers (VGAP and RFP) selected the articles, analyzing them by titles and abstracts and  
164 reached a consensus on the disagreements between reviewers. We created a clinical form containing the  
165 eligibility criteria to record the reasons for exclusion from each study using the flowchart. We excluded  
166 ineligible studies based on the eligibility criteria. After selecting the works, we obtained the full articles.

167

### 168 **Data extraction**

169 The following data were extracted from the included literature: reference with the first Author and  
170 year of publication, type of study, classification of study quality (risk of bias), number of images used in  
171 articles, type of neural network used (architecture, number of neurons), hyperparameters adopted, dental  
172 caries was categorized in presence or absence, sensitivity of the diagnostic method, specificity of the  
173 diagnostic method, accuracy of the method or area on the ROC curve.

174

### 175 **Quality of articles**

176 Two independent reviewers (VGAP and RFP) classified the articles by the instrument of critical  
177 evaluation and their risk of bias using the tool Quadas 2 (“Quality Assessment of Diagnostic Accuracy Studies-  
178 2”). Reviewers rated each work by consensus based on this tool to qualify the studies.

179

### 180 **Statistical analysis**

181 We used the sensitivity and specificity data, with the number of positive tests obtained by the “gold”  
182 standard and the number of tests to generate a 2x2 table with the TP, FP, FN and TN rates. With these rates,  
183 we recalculated the sensitivity and specificity values with their respective 95% confidence intervals and  
184 presented them in forest graphs (Forest Plots). As it is common that the presence of heterogeneity in  
185 diagnostic accuracy studies is not only by chance but also by the implicit variation of the cutoff point  
186 (threshold effect), the summary point that represents the sensitivity and rate of false positives (1-specificity)  
187 were combined using a bivariate model of random effects (Reitsma et al., 2005). We chose the bivariate  
188 model of random effects because it considers the correlation between the rates of sensitivity and false  
189 positives of the included studies. We evaluated the heterogeneity of the summarized ROC curve [SROC] by  
190 the I2 approach of Zhou & Dendurkuri, implemented in the Mada package. In addition to the summary point  
191 of sensitivity and rate of false positives (1-specificity), we also calculated the Positive Likelihood Ratio and  
192 Negative (RV+ and RV-) together with the estimate of the Diagnostic Odds Ratio [DOR] through the MCMC  
193 procedure of Zwindermann et al. (2008) parameters obtained by the bivariate model. We performed all  
194 analyses in R language (version 4.2 for Mac iOS) with the help of Mada (version 0.5.11) and DTAPlots (version  
195 1.0.2.5) packages.

196

### 197 **Quality assessment and publication bias**

198 To evaluate the quality of the studies, we applied the QUADAS-2 risk checklist to test the bias risk in  
199 each study (Table 2). The articles selected presented a low risk of bias. Most of the authors followed the  
200 STARD and/or CLAIM standards. QUADAS2 presents four domains (patient selection, Index test, reference  
201 test and follow-up over time).

202

### 203 **Results**

204 Based on the search strategy, 225 articles were selected from the databases. Among these, 78  
205 duplicates were removed, and 57 were excluded for other reasons, resulting in 90 articles. Upon reviewing  
206 the title and abstract, 57 papers were excluded for not meeting the eligibility criteria, 2 did not receive

207 responses from the authors, leaving 31 for full-text reading. Of these 31, 13 articles were deemed eligible for  
208 meta-analysis (Figure 1).

209

210 **Fig 1.** Flowchart.

211

212 In total, true positive (TP), false positive (FP), false negative (FN), and true negative (TN) rates from  
213 13 studies were utilized to generate the Forest Plot illustrating sensitivity and specificity. The sensitivity of  
214 machine learning for caries detection ranged from 0.58 to 0.90 across studies, and specificity ranged from  
215 0.68 to 0.95. The test for equality was statistically significant for both sensitivity ( $\chi^2=188.34$ ;  $p<0.0001$ ) and  
216 specificity ( $\chi^2=332.37$ ;  $p<0.0001$ ) with a weak negative correlation ( $\rho=-0.071$ ) between sensitivity rates and  
217 false positives (1-specificity), as demonstrated in Figure 2.

218 The result obtained by the bivariate random-effects model revealed that the sensitivity and  
219 specificity of machine learning for detecting dental caries were 0.79 (95% CI: 0.73; 0.84) and 0.87 (95% CI:  
220 0.81; 0.92), respectively. The summary receiver operating characteristic (SROC) curve's area under the curve  
221 (AUC) was 0.885, and the heterogeneity, estimated by the I<sup>2</sup> statistic using Zhou & Dendukuri's approach,  
222 was I<sup>2</sup> = 45.3% (Figure 2).

223

224 **Fig 2.** Forest Plot of machine learning accuracy measures in dental caries detection.

225

226 Figure 3 depicts the SROC, with the summary point of sensitivity and false positive rate (1-specificity)  
227 of machine learning for detecting dental caries. The SROC demonstrated an accuracy of 0.885 encompassing  
228 all studies within the prediction region. We calculated the Positive and Negative Likelihood Ratios along with  
229 the Diagnostic Odds Ratio estimate as presented in Table 3.

230

231 **Fig 3.** SROC (“Summary Receiver-Operating Characteristic”).

232

233 Additionally, based on the data, we constructed the Fagan's nomogram, as shown in Figure 4. The  
234 Fagan's nomogram illustrated that for a positive caries test diagnosed by convolutional neural networks, the  
235 probability of the tooth having caries is 86.01%, and the probability of it being a false negative when caries  
236 is not detected is 20%.

237

238 **Fig 4.** Fagan's nomogram

239

## 240 Discussion

241 Among the machine learning techniques until 2018, the supervised vector method [SVM] was the  
242 most used classification method. According to Santana et al. (2022) SVM have classification algorithms with  
243 better sensitivity values when compared to ANN. However, SVM and CNNs result in similar conclusions. CNNs  
244 are a class of deep learning algorithms that have been widely used in computer vision tasks, including caries  
245 detection. One of the main advantages of CNNs is the ability to detect relevant characteristics at different  
246 spatial scales, which is especially important for detecting caries, such as in X-ray images or smartphone  
247 photos.

248 SROC demonstrated an accuracy of 0.885, containing all studies within the prediction region and a  
249 summarized sensitivity of 0.79 (95%CI 0.73 to 0.84) and summarized specificity of 0.87 (95%CI 0.81 to 0.92)  
250 and heterogeneity of 45.3%. Of the articles selected for the meta-analysis, five authors worked with regions  
251 of interest [ROIs] to reduce dimensionality and make the diagnosis more accurate. However, sensitivity  
252 ranged from 0.58 to 0.80 and specificity from 0.77 to 0.98, not the only way to improve accuracy.

253 The sensitivity results among the authors ranged from 0.68 to 0.95. The two authors with the lowest  
254 sensitivity values were Askar et al. (2021) and Scwendicke et al. (2023), and the authors with the highest  
255 sensitivity values were Kühnisch et al. (2022) and Duong et al. (2021). The authors who presented the lowest  
256 specificity were Duong et al. (2021) and Park et al. (2022), and the highest specificity values were the works

257 of Estai et al. (2022) and Kim et al. (2022). There is an inverse relationship between sensitivity and specificity.  
258 Our review observed this relationship with the authors Duong et al. (2021) and Askar et al. (2021).

259 The clinical validity of caries diagnosis is complex because it requires a clinical diagnosis in which it  
260 needs to present clean, dry and well-lit teeth. Rx is considered a complementary examination to the clinical  
261 examination and requires experience from the dentist. Thus, even being considered the gold standard is not  
262 without error. The X-ray quality, as contrast and proper positioning, is another preponderant factor for a  
263 correct diagnosis. In all articles, dentists diagnosed from photos or X-rays, making the diagnosis less accurate  
264 in more subtle cases, such as white spots and caries without cavities, regardless of the evaluator's expertise,  
265 which can also impact machine learning.

266 The type of image in our study consisted of both photos of teeth of smartphones and images of X-  
267 ray (panoramic or interproximal). They are different images because the photos of smartphones and high-  
268 resolution cameras are coloured, while those from X-ray have grayscale. The authors who used camera  
269 photos were Askar et al. (2021), Schwendicke et al. (2023), Duong et al. (2021), Kühnisch et al. (2022) and  
270 Park et al. (2022). The other authors used X-ray (bitewing or panoramic) or CT scans. This diversity of images  
271 may be one of the explanations for the heterogeneity among the authors. The hyperparameters the authors  
272 used showed similarities in the learning rate (between 0.001 and 0.00001). The number of times varied  
273 considerably among the authors (10 to 10,000). There were also variations between the number of batches  
274 (2 to 150).

275 Most authors used Transfer Learning and cross-entropy as a method of deep learning. Another  
276 important factor to highlight and may be related to the differences in sensitivities and specificity of AIs  
277 learning is the network architecture adopted in each study. The high number of layers with fewer images can  
278 cause overfitting. Of the selected studies, 23.08% (3 articles) used 50 layers, 30.77% (4 articles) used 18  
279 layers, and 15.38% (2 articles) used 22-25 layers of artificial neurons. The author who presented high  
280 sensitivity and specificity values was Kühnisch et al. (2022), who used 1891 images of all types of teeth in  
281 training the network architecture of 18 layers and the type of learning of Transfer Learning and cross-entropy.

282 The sample size is a crucial point for machine learning. The sample size and proportion of the disease  
283 are parameters that alter diagnostic test sensitivity and specificity values (Linnet et al. 2012). The volume of  
284 images in training is one of the main factors for adequate learning and, consequently, better accuracy values.  
285 However, having a database with large volume, veracity, and image quality is the most significant difficulty  
286 encountered in studies. There were large variations between authors regarding the number of images  
287 obtained and augmented for training. The images were enlarged by delimiting regions of interest, rotating  
288 among other techniques, and may have improved sensitivity and/or specificity. However, new studies with  
289 different severities of caries disease need to be carried out to improve the accuracy of CNN, especially in  
290 initial caries where the diagnosis is difficult.

291 The articles selected presented a low risk of bias since most of the authors followed the STARD  
292 and/or CLAIM standards. QUADAS2 presents four domains (patient selection, Index test, reference test and  
293 follow-up over time). In the case of artificial intelligence use, several domains receive low risk because, for  
294 the first domain, a large number of patients and images are obtained from several sources randomly. As for  
295 the index and pattern domains, all images pass the pattern for the index test to learn to diagnose. Thus, a  
296 low risk of bias was attributed. However, it is worth remembering that QUADAS2 is a tool to assess the risk  
297 of bias from conventional diagnostic tests and is not being developed for diagnostic test analysis for AIs. With  
298 the increasing use of IA in diagnostic tests, there is a need to develop a specific tool for these cases in  
299 systematic reviews. Only the author Kim et al. (2022) classified it as uncertain due to the incomplete  
300 description of the network architecture of the index test and the network training method. However, it is  
301 worth remembering that the tool still needs to be specific to evaluate articles that use artificial intelligence  
302 as an index test.

303 The DOR measures the effectiveness of the diagnostic test analyzed and is independent of the  
304 disease's prevalence, unlike the test's accuracy. The AIs presented a DOR of 25.11 times of the test when  
305 giving positive results of the individual with the disease concerning those without the disease and a 95%  
306 confidence interval ranging from 13.96 to 45.20. We can also verify through the Fagan nomogram that the  
307 CNNs presented the probability of 86.1% of diagnosing existing caries and only 20% of false negatives.

308 Despite the values obtained in our study, the improvement of the sensitivity, specificity and accuracy  
309 of CNNs can still be explored in future studies with the impact analysis of the number of training images,  
310 types of images, prevalence of disease and different architectures in the diagnosis of caries, enabling its use  
311 in modern dentistry with greater safety.

312

### 313 Conclusion

314 Using artificial intelligence through convolutional neural networks to diagnose caries showed global  
315 accuracy (0.88), and it can be trained to detect visual patterns that indicate the presence of caries in both X-  
316 ray images and photos and can be used in new devices to assist the dentist in diagnosing caries disease.

317

### 318 References

- 319 1. Bagramian R.A.; Garcia-Godoy F.; Volpe A.R. 2009. The global increase in dental caries. A pending  
320 public health crisis. *Am J Dent* 22(1):3–8.
- 321 2. Braga M.M.; Mendes F.M.; Ekstrand K.R. 2010. Detection activity assessment and diagnosis of dental  
322 caries lesions. *Dent Clin North Am* 54 (3): 479-93.
- 323 3. LeCun Y.; Bengio Y.; Hinton G. 2015. Deep learning. *Nature* 521(7553): 436–444.
- 324 4. Leong P.M.; Gussy M.G.; Barrow S.Y.; de Silva-Sanigorski A.; Waters E. 2013. A systematic review of  
325 risk factors during first year of life for early childhood caries. *Int J Paediatr Dent* 23(4):235–250.
- 326 5. Losso E.M.; Tavares M.C.R.; Silva J.Y.B.; Urban C.A. 2009. Cárie precoce e severa na infância: uma  
327 abordagem integral. *J Pediatr* 85(4):295-300.
- 328 6. Marinho V.A., Pereira G.M. 1998. Revisão de literatura cárie: diag- nóstico e plano de tratamento.  
329 *Rev Un Alfenas* 4: 27-37.
- 330 7. Nyvad D, B. 2004. Diagnosis versus detection of caries. *Caries Res* 38(3): 192-8.
- 331 8. Pretty I.A. 2006. Caries detection and diagnosis: Novel Technologies. *J Dent* 34 (10): 727-39.
- 332 9. Purger F.P.; Oliveira P.R.A.; Vasconcellos A. et al. 2011. Relative importance of radiographs in  
333 diagnosing primary molar’s proximal caries. *Journal Dental Research* 90, IADR/AADR General Session  
334 & Exhibition Abstracts.
- 335 10. Reitsma J.B.; Glas A.S.; Rutjes W.S.; Scholten R.J.P.M.; Bossuyt P.M.; Zwinderman A.H. 2005. Bivariate  
336 analysis of sensitivity and specificity produces informative summary measures in diagnostic reviews.  
337 *Journal of Clinical Epidemiology* 58: 982–990.
- 338 11. Santana C.P.; Carvalho E.A.; Rodrigues I.D.; Bastos G.S.; Souza A.D.; Brito L.L. 2022. Rs-fMRI and  
339 Machine learning for ASD diagnosis: A systematic review and meta-analysis. *Scientific Reports* 12:  
340 6030.
- 341 12. Silva P.R.D.S. 2008. Avaliação da acurácia dos métodos radiográficos convencional e digital direto na  
342 análise da extensão de lesões de cárie oclusais em molares decíduos. *Estudo In Vitro. São Paulo tese*  
343 *(doutorado) – FO/USP.*
- 344 13. Soares G.G.; Souza P.R.; Purger F.P.C.; Vasconcellos A.B.; Ribeiro AA. 2012. Métodos de detecção de  
345 Cárie. *Rev bras odontol* 69 (1):84-9.
- 346 14. Uribe S. 2009. Early childhood caries–risk factors. *Evid Based Dent* 10(2):37-38.
- 347 15. Wenzel A. 2004. Bitewing and digital bitewing radiography for detec- tion of caries lesions. *J Dent*  
348 *Res* 83: C72-5.
- 349 16. Zhou Y. & Dendukuri N. 2014. Statistics for quantifying heterogeneity in univariate and bivariate  
350 meta-analyses of binary data: the case of meta-analyses of diagnostic accuracy. *Stat Med* 33(16):  
351 2701-17.
- 352 17. Zwinderman A.H.; Glas A.S.; Bossuyt P.M. 2008. Statistical models for quantifying diagnostic accuracy  
353 with multiple lesions per patient. *Biostatistics* 9(3):513–522.

1

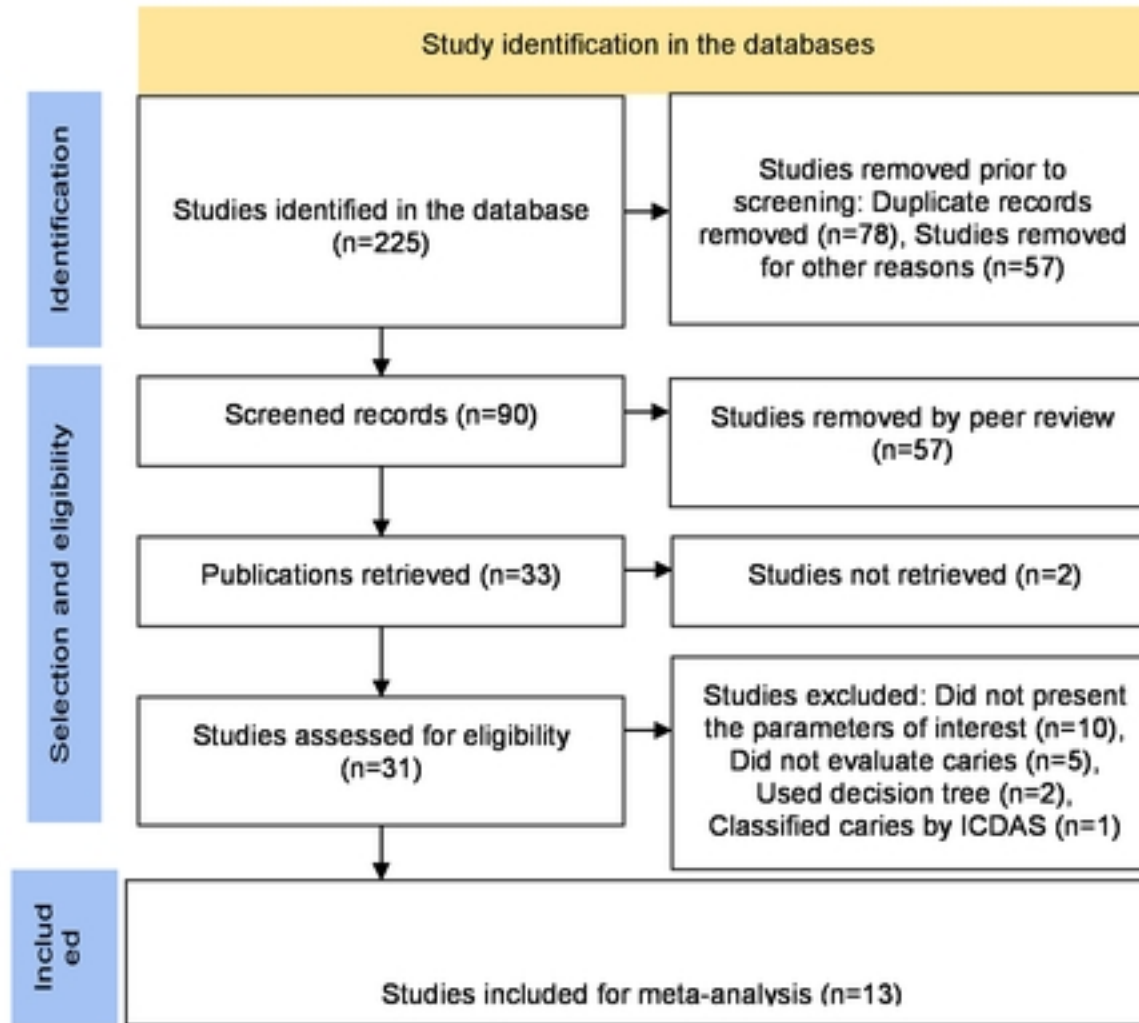

2

3

4

Fig 1. Flowchart.



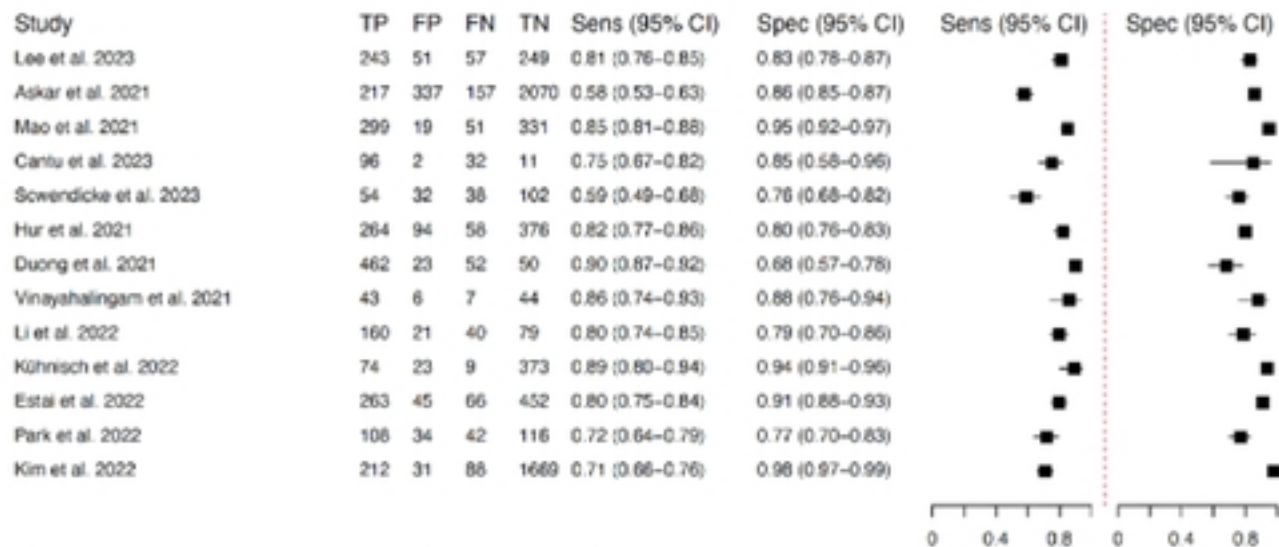

5  
6 **Fig 2.** Forest Plot of machine learning accuracy measures in dental caries detection.

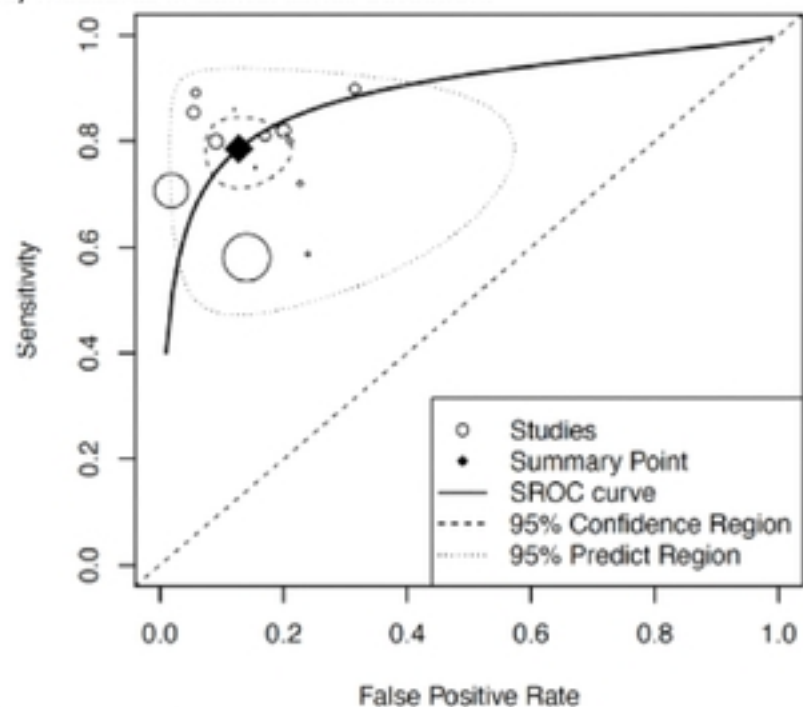

7  
8 **Fig 3.** SROC ("Summary Receiver-Operating Characteristic").

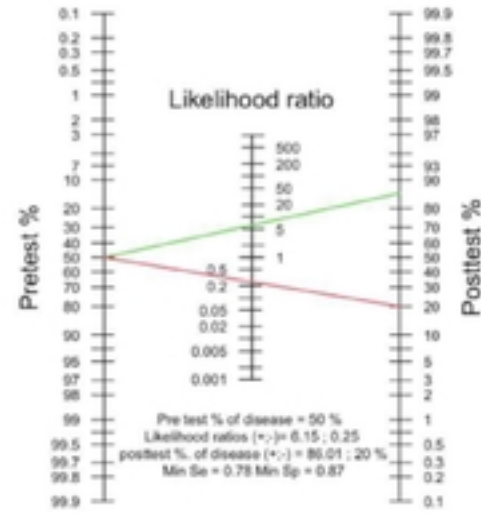

| ##   | pre       | post.pos  | post.neg  | min.LRpos | max.L |
|------|-----------|-----------|-----------|-----------|-------|
| Rneg | minSe     | minSp     |           |           |       |
| ##   | 0.5000000 | 0.8601399 | 0.2000000 | 6.1500000 | 0.250 |
| 0000 | 0.7817797 | 0.8728814 |           |           |       |

10  
 11 **Fig 4.** Fagan's nomogram

12  
 13  
 14  
 15  
 16  
 17  
 18  
 19  
 20  
 21  
 22  
 23  
 24  
 25

26 **Table 1.** Characteristics of selected articles  
27

| Author/ Year               | Positive gold standard image (test bench) | Total image (Test bench) | Tooth type                      | Image acquisition method       | Image area    | Total images | Total training | Training with cavities | Learning type                          | Number of layers | Batches | Seasons | Momentum | Learning rate |
|----------------------------|-------------------------------------------|--------------------------|---------------------------------|--------------------------------|---------------|--------------|----------------|------------------------|----------------------------------------|------------------|---------|---------|----------|---------------|
| Lee et al. 2023            | 300                                       | 600                      | Molar and/or premolar           | Periapical X-Ray               | Tooth         | 3000         | 2400           | 1200                   | Transferring learning                  | 22               | 32      | 1000    | NI       | 0.01          |
| Askar et al. 2021          | 374                                       | 2781                     | Incisors and canines            | Pictures                       | ROI           | 2781         | .              | 374                    | .                                      | 8                | 150     | .       | 0.9      | 0.00006       |
| Mao et al. 2021            | 350                                       | 700                      | Molar and/or premolar           | Bitewing X-Ray                 | Tooth labeled | 3716         | 700            | 350                    | Transferring learning                  | 25               | 64      | 100     | 0.9      | 0.00006       |
| Cantu et al. 2023          | 128                                       | 141                      | Molar and/or premolar           | Bitewing X-Ray                 | Tooth Labeled | 3686         | 3293           | .                      | Adaptive moment estimation             | NI               | 2       | 190     | NI       | 0.00005       |
| Schwendicke et al. 2023    | 92                                        | 226                      | Extracted molar and/or premolar | Intraoral Picture              | Tooth         | 226          | 226            | 92                     | Transferring learning                  | 50               | NI      | NI      | NI       | 0.00001       |
| Hur et al. 2021            | 322                                       | 792                      | Molar                           | Panoramic X-Ray and tomography | Tooth         | 2642         | 2400           | NI                     | Transferring learning                  | NI               | NI      | NI      | NI       | 0.0001        |
| Duong et al. 2021          | 514                                       | 587                      | Molar and/or premolar           | Smartphones Pictures           | Tooth         | 587          | NI             | 293                    | Transferring learning                  | 50               | NI      | 10      | NI       | 0.0001        |
| Vinayahalingam et al. 2021 | 50                                        | 100                      | Third molar                     | Panoramic X-Ray                | Tooth         | 500          | 320            | 200                    | Transferring learning                  | 18               | 32      | 10      | NI       | 0.0001        |
| Li et al. 2022             | 200                                       | 300                      | All types                       | Periapical X-Ray               | ROI           | 4129         | 3829           | 2062                   | Cross-entropy                          | 18               | 50      | 200     | NI       | 0.0001        |
| Kühnisch et al. 2022       | 83                                        | 479                      | All types                       | Nikon Pictures                 | Tooth         | 2417         | 1891           | 348                    | Transferring learningn / cross-entropy | 18               | 16      | 50      | NI       | 0.001         |
| Estai et al. 2022          | 329                                       | 862                      | Molar and/or premolar           | Bitewing X-Ray                 | ROI           | 8618         | 7756           | 2967                   | Transferring learning                  | 50               | 64      | 10      | NI       | 0.001         |
| Park et al. 2022           | 150                                       | 300                      | Molar and/or premolar           | Intraoral Picture              | ROI           | 1938         | 1638           | 678                    | Cross-entropy                          | 18               | NI      | 20      | NI       | 0.001         |
| Kim et al. 2022            | 300                                       | 2000                     | Molar and/or premolar           | Panoramic X-Ray                | ROI           | 10           | NI             | NI                     | Softmax                                | NI               | NI      | 10      | NI       | 0.001         |

28 ROI regions of interest. NI not informed.

29 **Table 2.** Risk of bias of selected studies

| Author                | Year | Domain 1 |     | Domain 2 |         | Domain 3 |     | Domain 4 |     | Bias Risk |
|-----------------------|------|----------|-----|----------|---------|----------|-----|----------|-----|-----------|
|                       |      | A        | B   | A        | B       | A        | B   | A        |     |           |
| Lee et al.            | 2023 | LOW      | LOW | LOW      | LOW     | LOW      | LOW | LOW      | LOW | LOW       |
| Askar et al.          | 2021 | LOW      | LOW | LOW      | LOW     | LOW      | LOW | LOW      | LOW | LOW       |
| Mao et al.            | 2021 | LOW      | LOW | LOW      | LOW     | LOW      | LOW | LOW      | LOW | LOW       |
| Cantu et al.          | 2023 | LOW      | LOW | LOW      | LOW     | LOW      | LOW | LOW      | LOW | LOW       |
| Schwendicke et al.    | 2023 | LOW      | LOW | LOW      | LOW     | LOW      | LOW | LOW      | LOW | LOW       |
| Hur et al.            | 2021 | LOW      | LOW | LOW      | LOW     | LOW      | LOW | LOW      | LOW | LOW       |
| Duong et al.          | 2021 | LOW      | LOW | LOW      | LOW     | LOW      | LOW | LOW      | LOW | LOW       |
| Vinayahalingam et al. | 2021 | LOW      | LOW | LOW      | LOW     | LOW      | LOW | LOW      | LOW | LOW       |
| Li et al.             | 2022 | LOW      | LOW | LOW      | LOW     | LOW      | LOW | LOW      | LOW | LOW       |
| Kühnisch et al.       | 2022 | LOW      | LOW | LOW      | LOW     | LOW      | LOW | LOW      | LOW | LOW       |
| Estai et al.          | 2022 | LOW      | LOW | LOW      | LOW     | LOW      | LOW | LOW      | LOW | LOW       |
| Park et al.           | 2022 | LOW      | LOW | LOW      | LOW     | LOW      | LOW | LOW      | LOW | LOW       |
| Kim et al.            | 2022 | LOW      | LOW | Unclear  | Unclear | LOW      | LOW | LOW      | LOW | Unclear   |

30

31 **Table 3.** Estimates of diagnostic accuracy of machine learning to detect dental caries.

| Estimators            | Median | CI inferior | CI superior |
|-----------------------|--------|-------------|-------------|
| Positive Likelihood   | 6,15   | 4,03        | 9,63        |
| Negative Likelihood   | 0,25   | 0,19        | 0,32        |
| Odds Ratio Diagnostic | 25,11  | 13,96       | 45,2        |

32
